# Supplementary material for: Galactose-deficient IgA1 Is Involved in IgA Deposition in Renal Grafts Biopsied One Hour after Kidney Transplantation
Source: PubMed Central journal article supplement — Intern Med. 2022 Oct 26;62(11):1581–9. doi: 10.2169/internalmedicine.0141-22 (PMC10293007; doi:10.2169/internalmedicine.0141-22), 2022-10-26
Supplement: 1349-7235-62-1581-s001.pdf [file 1349-7235-62-1581-s001.pdf]

**Supplementary Table1. Clinical characteristics of donors 5 years after kidney transplantation**

**Donor characteristics**

|                                                                 |                 |
|-----------------------------------------------------------------|-----------------|
| Donors, n                                                       | 22              |
| Donor age, years, median (IQR)                                  | 64 (60.0,70.5)  |
| Donor male gender, n (%)                                        | 14 (64)         |
| hematuria >5 HPF,n                                              | 0               |
| proteinuria >0.3 g/day,n                                        | 0               |
| Donor serum creatinine, mg/dl, median (IQR)                     | 1.21(0.98,1.32) |
| Donor eGFR(creatinine),mL/min/1.73m <sup>2</sup> , median (IQR) | 44.3(42.2,47.3) |
| C3 (+) at 1hr protocol biopsy, n (%)                            | 15(68.1)        |

IQR: interquartile range, HPF: high power field, eGFR: estimated glomerular filtration rate

**Supplementary Table 1**
