# Supplementary material for: Galactose-deficient IgA1 Is Involved in IgA Deposition in Renal Grafts Biopsied One Hour after Kidney Transplantation
Source: PubMed Central journal article supplement — Intern Med. 2022 Oct 26;62(11):1581–9. doi: 10.2169/internalmedicine.0141-22 (PMC10293007; doi:10.2169/internalmedicine.0141-22), 2022-10-26
Supplement: 1349-7235-62-1581-s002.pdf [file 1349-7235-62-1581-s002.pdf]

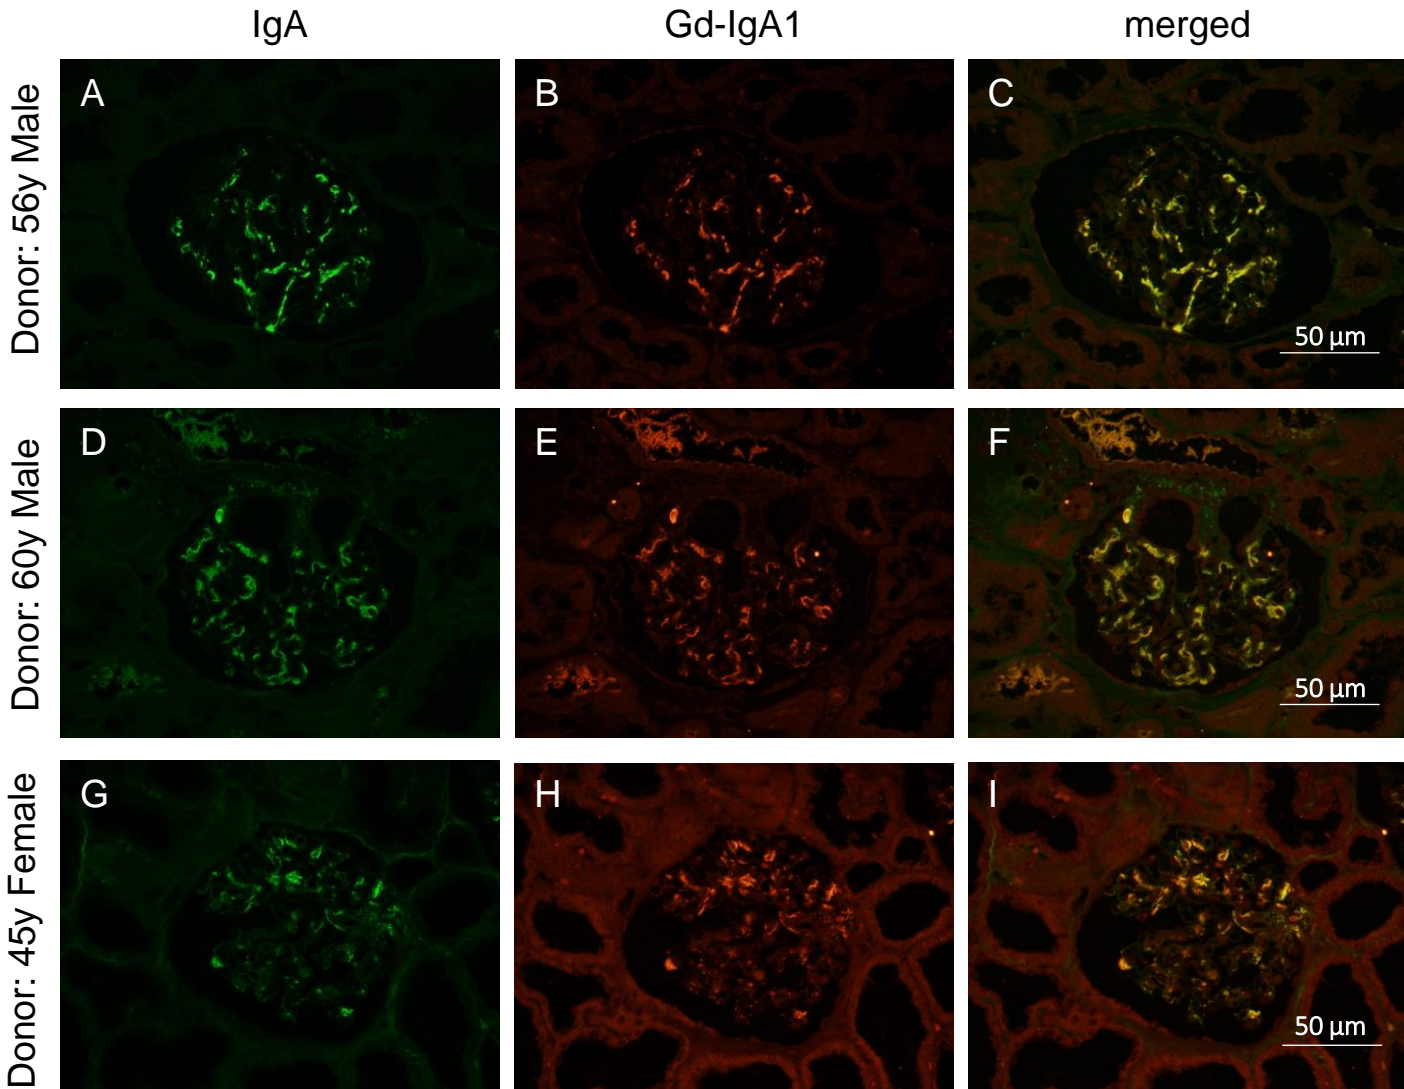

**Supplementary Figure 1.**

**Double immunofluorescence staining for IgA and Gd-IgA1 in transplanted kidneys with IgA deposition.**

Images of double immunofluorescence staining for immunoglobulin A (IgA) and galactose-deficient IgA1 (Gd-IgA1) in three representative cases of transplanted kidneys with IgA deposition biopsied 1 hour after transplantation are shown. **(A, D, and G):** IgA staining. **(B, E, and H):** Gd-IgA1 staining. **(C, F, and I):** merged images. Gd-IgA1 was merged with IgA, suggesting that deposition stained by IgA antibody and Gd-IgA1 deposition were identical. Scale bars = 50  $\mu$ m.

Supplementary Figure 1
