# Supplementary material for: Galactose-deficient IgA1 Is Involved in IgA Deposition in Renal Grafts Biopsied One Hour after Kidney Transplantation
Source: PubMed Central journal article supplement — Intern Med. 2022 Oct 26;62(11):1581–9. doi: 10.2169/internalmedicine.0141-22 (PMC10293007; doi:10.2169/internalmedicine.0141-22), 2022-10-26
Supplement: 1349-7235-62-1581-s003.pdf [file 1349-7235-62-1581-s003.pdf]

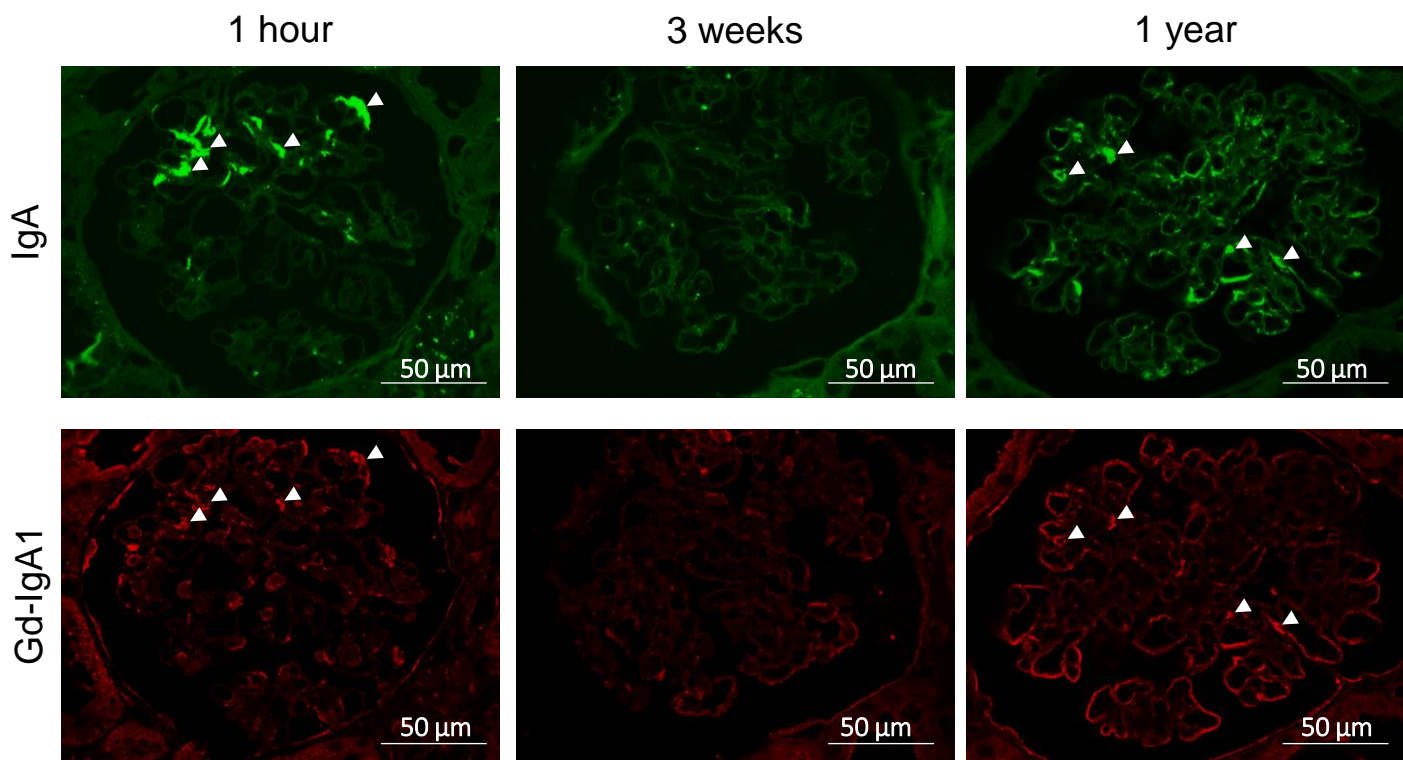

**Supplementary Figure 2.**

**Time course of immunofluorescence staining for IgA and Gd-IgA1 in a patient with IgA nephropathy as the primary kidney disease.**

Images show the time course of immunoglobulin A (IgA) and galactose-deficient IgA1 (Gd-IgA1) staining in a kidney biopsy 1 hour after transplantation, 3 weeks later, and 1 year later derived from a patient whose primary kidney disease was IgA nephropathy. The findings indicated IgA and Gd-IgA1 deposition at 1 hour, disappearance of IgA and Gd-IgA1 3 weeks later, and redeposition of IgA and Gd-IgA1 1 year later. Arrowheads indicate deposition of IgA and Gd-IgA1. Scale bars = 50 μm.

Supplementary Figure 2
